# Supplementary material for: Is Olympic inspiration associated with fitness and physical activity in English schoolchildren? A repeated cross-sectional comparison before and 18 months after London 2012
Source: PubMed Central journal article supplement — BMJ Open. 2016 Nov 1;6(11):e011670. doi: 10.1136/bmjopen-2016-011670 (PMC5168498; doi:10.1136/bmjopen-2016-011670), 2016-11-01
Supplement: bmjopen-2016-011670supp.pdf [file bmjopen-2016-011670supp.pdf]

**sExtract from Study Questionnaire.**

**1.** Which best describes what **you** did during the London 2012 Olympics (Tick one)

|                                                                  |  |
|------------------------------------------------------------------|--|
| I followed it very closely (watched daily)                       |  |
| I followed it quite closely (watched highlights and some events) |  |
| I followed it very little (watched occasionally)                 |  |
| I did not follow it at all                                       |  |

**2.** Did you go to see a live Olympic or Paralympic event?

|     |  |    |  |
|-----|--|----|--|
| Yes |  | No |  |
|-----|--|----|--|

**3.** Did you visit an Olympic venue?

|     |  |    |  |
|-----|--|----|--|
| Yes |  | No |  |
|-----|--|----|--|

**4.** Have you been inspired to try a new sport or activity since the 2012 Olympic Games? *Please **do not** include activities you did during PE lessons.*

|     |  |    |  |
|-----|--|----|--|
| Yes |  | No |  |
|-----|--|----|--|

a. If **Yes**, which sport \_\_\_\_\_ or activity \_\_\_\_\_

**5.** Are you still taking part in this sport or activity?

|     |  |    |  |
|-----|--|----|--|
| Yes |  | No |  |
|-----|--|----|--|
