# Supplementary material for: Is Olympic inspiration associated with fitness and physical activity in English schoolchildren? A repeated cross-sectional comparison before and 18 months after London 2012
Source: PubMed Central journal article supplement — BMJ Open. 2016 Nov 1;6(11):e011670. doi: 10.1136/bmjopen-2016-011670 (PMC5168498; doi:10.1136/bmjopen-2016-011670), 2016-11-01
Supplement: bmjopen-2016-011670supp_table1.pdf [file bmjopen-2016-011670supp_table1.pdf]

**Supplementary Table 1.** Detailed Listing of Sports and Activities Inspired by The Olympic Games in a subsample of schoolchildren from the East of England measured 18±2 months following London 2012.

| <b>Sport or Activity</b>       | <b>n=</b> | <b>%</b> | <b>Sport or Activity</b>  | <b>n=</b>    | <b>%</b>     |
|--------------------------------|-----------|----------|---------------------------|--------------|--------------|
| <b>Summer Olympics Events</b>  |           |          |                           |              |              |
| Running or Athletics           | 103       | 21.2     | Hockey                    | 3            | .6           |
| Swimming/Synchronized-Swimming | 61        | 12.6     | Table tennis              | 3            | .6           |
| Football                       | 36        | 7.4      | Fencing                   | 2            | .4           |
| Gymnastics                     | 32        | 6.6      | Kayaking                  | 2            | .4           |
| Rugby                          | 32        | 6.6      | Rowing                    | 2            | .4           |
| Basketball                     | 28        | 5.8      | Sailing                   | 2            | .4           |
| Netball                        | 25        | 5.2      | Shooting                  | 2            | .4           |
| Cycling                        | 20        | 4.1      | Squash                    | 1            | .2           |
| Tennis                         | 19        | 3.9      | Volleyball                | 1            | .2           |
| Trampolining                   | 17        | 3.5      | <i>Total</i>              | <i>n=485</i> | <i>95.4%</i> |
| Handball                       | 13        | 2.7      | <b>Non-Olympic Events</b> | <b>n=</b>    | <b>%</b>     |
| Badminton                      | 12        | 2.5      | <i>Cricket</i>            | 8            | 1.6          |
| Diving                         | 8         | 1.6      | <i>Parkour</i>            | 4            | .8           |
| Martial Arts                   | 8         | 1.6      | <i>Rounders</i>           | 4            | .8           |
| Boxing                         | 7         | 1.4      | <i>Golf</i>               | 3            | .6           |
| Canoeing                       | 6         | 1.2      | <i>Cheerleading</i>       | 2            | .4           |
| BMX                            | 5         | 1.0      | <i>Ice skating</i>        | 2            | .4           |
| Archery                        | 4         | .8       | <i>Total</i>              | 23           | 4.6%         |
| Equestrian                     | 4         | .8       |                           |              |              |
| Waterpolo                      | 4         | .8       | Missing/Illegible         | 4            |              |
