# Supplementary material for: Is Olympic inspiration associated with fitness and physical activity in English schoolchildren? A repeated cross-sectional comparison before and 18 months after London 2012
Source: PubMed Central journal article supplement — BMJ Open. 2016 Nov 1;6(11):e011670. doi: 10.1136/bmjopen-2016-011670 (PMC5168498; doi:10.1136/bmjopen-2016-011670), 2016-11-01
Supplement: bmjopen-2016-011670supp_table2.pdf [file bmjopen-2016-011670supp_table2.pdf]

**Supplementary Table 2.** Repeated cross-sectional comparison of children from ( $n=6$ ) schools measured 36 months before and 18 months after London 2012.

| Boys                                                                       | Pre-2012 |        | Post-2012 |        | <i>t</i> -test    | Effect size |
|----------------------------------------------------------------------------|----------|--------|-----------|--------|-------------------|-------------|
|                                                                            | (n=407)  |        | (n=513)   |        |                   |             |
|                                                                            | Mean     | SD     | Mean      | SD     |                   |             |
| Age (years)                                                                | 12.2     | (1.42) | 12.4      | (1.46) | $t=1.2, p=0.188$  | $d=0.08$    |
| VO <sub>2peak</sub> <sup>a</sup> (ml·kg <sup>-1</sup> ·min <sup>-1</sup> ) | 46.2     | (5.4)  | 44.2      | (5.4)  | $t=4.8, p<0.001$  | $d=0.37$    |
| Physical Activity <sup>b</sup> (PAQ-A)                                     | 3.02     | (0.75) | 2.92      | (0.73) | $t=1.9, p=0.059$  | $d=0.14$    |
| BMI (z-score)                                                              | 0.71     | (1.18) | 0.32      | (1.42) | $t=4.5, p<0.001$  | $d=0.30$    |
| Girls                                                                      | Pre-2012 |        | Post-2012 |        | <i>t</i> -test    | Effect size |
|                                                                            | (n=366)  |        | (n=418)   |        |                   |             |
|                                                                            | Mean     | SD     | Mean      | SD     |                   |             |
| Age (years)                                                                | 11.9     | (1.5)  | 12.2      | (1.5)  | $t=1.7, p=0.088$  | $d=0.18$    |
| VO <sub>2peak</sub> <sup>a</sup> (ml·kg <sup>-1</sup> ·min <sup>-1</sup> ) | 42.1     | (6.6)  | 40.1      | (5.6)  | $t=4.9, p<0.001$  | $d=0.38$    |
| Physical Activity <sup>b</sup> (PAQ-A)                                     | 2.56     | (0.64) | 2.58      | (0.61) | $t=0.49, p=0.621$ | $d=0.01$    |
| BMI (z-score)                                                              | 0.53     | (1.1)  | 0.39      | (1.24) | $t=1.6, p=0.103$  | $d=0.12$    |

**Legend:** Pre-2012 data collected 2009; Post-2012 Collected October 2013 and June-July 2014. BMI – Body mass index, z-score calculated using the UK1990 Growth Reference. (Cole et al., 1995); <sup>a</sup>-estimated from 20 m shuttle-run using equation of Leger et al. (1988); <sup>b</sup>-Assessed using Physical Activity Questionnaire for Adolescents (Crocker et al. 1997), <sup>c</sup>- Effect size is Cohen's *d*. Data were collected from the same schools all <50 km of the Olympic Park September-October 2008 and May-July 2009 or October 2013 & June-July 2014.
